# Supplementary material for: Development of a deep-blue exciplex as an emitter and a host for highly efficient and wide-color OLEDs
Source: Royal Society of Chemistry journal article supplement (doi:10.1039/d3tc00341h), 2023-01-01
Supplement: d3tc00341h1.pdf [file d3tc00341h1.pdf]

# Supporting Information for

## Development of deep-blue exciplex as emitter and host for highly efficient and wide-color OLEDs

Qing Xia<sup>#</sup>, Yuhao Xiang<sup>#</sup>, Yujie Gong, Shuai Li, Yishi Wu, Zhijia Wang, Hongbing Fu<sup>\*</sup>

Beijing Key Laboratory for Optical Materials and Photonic Devices, Department of Chemistry,  
Capital Normal University, Beijing 100048, P. R. China.

*E-mail:* [hbfbu@cnu.edu.cn](mailto:hbfbu@cnu.edu.cn)

<sup>#</sup>Q. X. and Y. X. contributed equally to this work.

Keywords: deep-blue exciplex emission, thermally activated delayed  
fluorescence, organic light-emitting diode, energy transfer, phosphorescence

### ***A. Experimental Details.***

#### ***Synthesis of (Z)-3-(diphenylamino)-3-hydroxy-N,N-diphenylacrylamide (DNPhDCO):***

Diphenylamine (1.015 g, 6 mmol) and 30 mL dry tetrahydrofuran (THF) were added into a 50 mL two neck flask. Under nitrogen atmosphere, 0.3 mL malonyl dichloride (3 mmol) was added slowly. The reaction was then stirred at room temperature for 1 hour. Then, the reaction solution was concentrated under reduced pressure. The crude product was recrystallization from ethanol to afford DNPhDCO as white solid (0.89 g, 72%).

***Synthesis of Difluoroboron (Z)-3-(diphenylamino)-3-hydroxy-N,N-diphenylacrylamide (DNPhB):*** Compound DNPhDCO (813 mg, 2 mmol) was dissolved in 30 mL of dry CH<sub>2</sub>Cl<sub>2</sub>. Under nitrogen atmosphere, BF<sub>3</sub>·Et<sub>2</sub>O (760 μL, 6 mmol) solution was added. The reaction mixture was stirred at room temperature overnight in the dark. Then add ethanol to the solution, Then, the reaction solution was concentrated under reduced pressure. The crude product was recrystallization from ethanol to afford DNPhB as white solid (0.835g, 66%). <sup>1</sup>H NMR (400 MHz, d-DMSO, ppm): δ= 7.40 (t, J = 16 Hz, 8H), 7.35-7.27 (m, 12H), 4.03 (s, 1H). <sup>13</sup>C NMR (151 MHz, CDCl<sub>3</sub>) δ 167.6, 141.2, 129.3, 127.3, 127.2, 71.3.

**Instruments:** <sup>1</sup>H NMR, <sup>13</sup>C NMR spectra were recorded on a Bruker ADVANCE-400 fourier transformation spectrometer. The spectra were calibrated with respect to the residual solvent peaks. The chemical shifts are reported in parts per million (ppm) with respect to TMS. Short notations used are, s for singlet, d for doublet, t for triplet, q for quartet and m for multiplet.

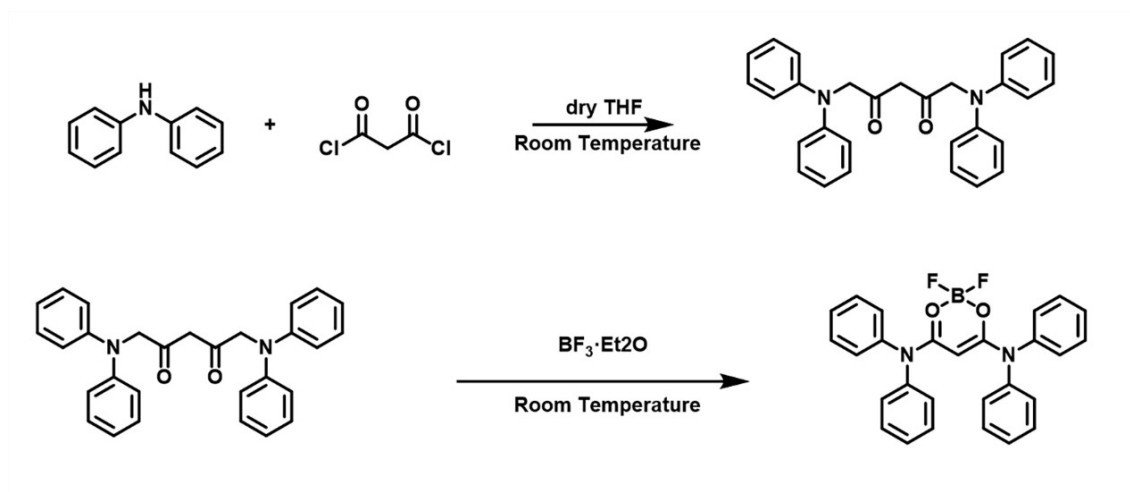

**Scheme S1.** The synthetic route of compound DNPhB.

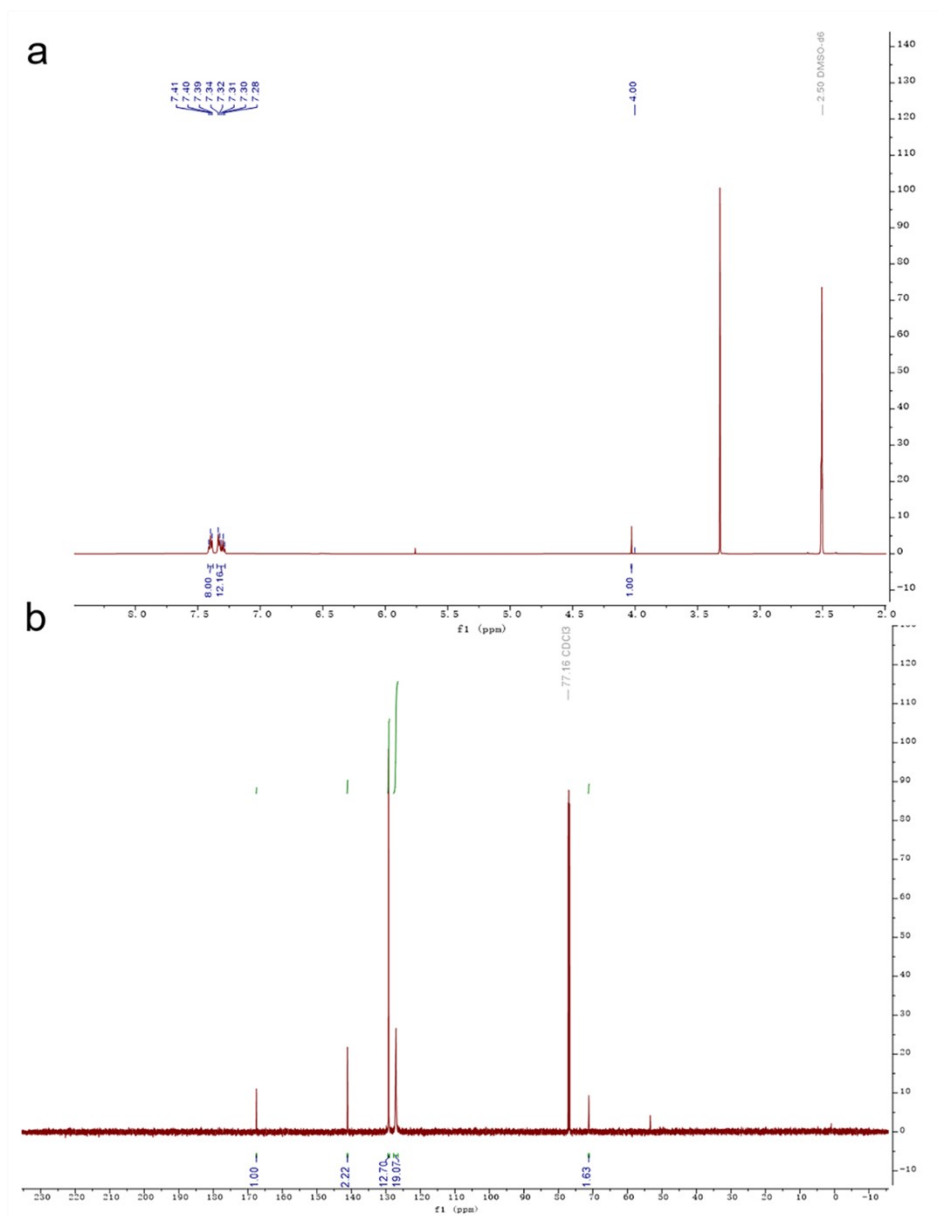

**Fig. S1** (a)  $^1\text{H}$  NMR spectrum of DNPhB in  $d$ -DMSO, (b)  $^{13}\text{C}$  NMR spectrum of DNPhB in  $\text{CDCl}_3$ .

### Ultraviolet Photo-electron Spectroscopy measurements (UPS):

UPS measurements were conducted with a Kratos Axis Ultra <sup>DLD</sup> spectrometer (Kratos, Manchester, England). During UPS measurement, the sample was held at a bias of -9 V with respect to the spectrometer. Illumination at 21.22 eV was provided by the He(I) emission line from a helium discharge lamp.

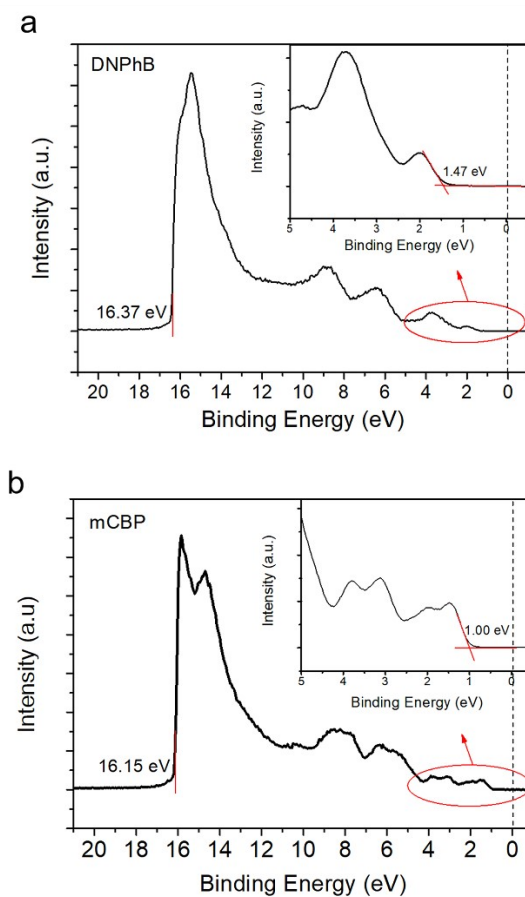

**Fig. S2** Ultraviolet photoelectron spectroscopy (UPS) of (a) mCBP, (b) DNPhB.

**Table S1.** The data of HOMO/LUMO of mCBP and DNPhB in neat films.

| Sample | HOMO <sup>a</sup> (eV) | LUMO <sup>b</sup> (eV) |
|--------|------------------------|------------------------|
| DNPhB  | -6.32                  | -2.90                  |
| mCBP   | -6.07                  | -2.59                  |

<sup>a</sup> Measured in ultraviolet photoelectron spectroscopy (UPS) at the same time; <sup>b</sup> Calculated from

$\lambda_{\text{onset}}$ .

### Theoretical calculations

All the density functional theory (DFT) calculations are performed using Gaussian 09 software package with B3LYP functional and 6-31G(d) basis set.

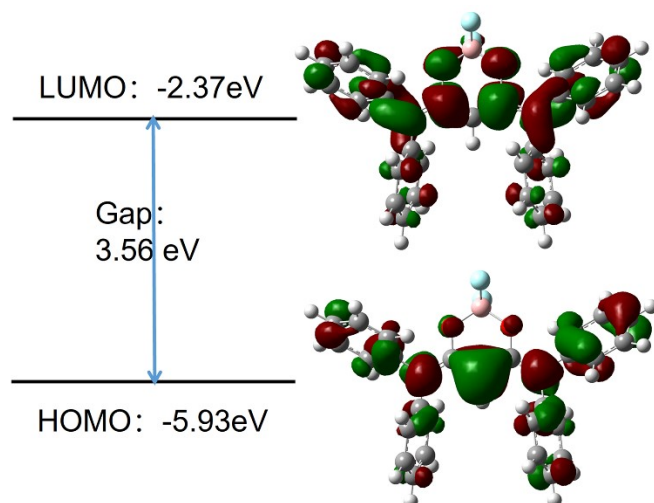

**Fig. S3** Optimized geometry and molecular orbitals of DNPhB

**Table S2.** Calculated emission wavelength, oscillator strength (f) and HOMO/LUMO level for DNPhB at the B3LYP/ 6-31G(d) level.

| Structure | $\lambda_{\text{abs}}$<br>(nm) | $\lambda_{\text{PL}}$<br>(nm) | HOMO<br>(eV) | LUMO<br>(eV) |
|-----------|--------------------------------|-------------------------------|--------------|--------------|
| DNPhB     | 315<br>f= 0.9079               | 496<br>f= 0.3500              | -5.93        | -2.37        |

### ***Photophysical Property Measurements:***

The UV-visible absorption spectra were measured on a Hitachi UV-U3900H spectrometer with a slit width of 1 nm. The photoluminescence (PL) spectra were measured on a Hitachi F-4600 and Edinburgh FLS 1000 fluorescence spectrophotometer. The fluorescence lifetime and time-resolved emission spectrum detected with a streak camera (C10647, Hamamatsu Photonics) upon 400 nm femtosecond laser excitation. The temperature-dependent lifetime decay profiles were measured using a closed cycle cryostat (oxford-instruments Optistat DN). The phosphorescence spectrum was obtained using an Edinburgh FLS 1000 fluorescence spectrophotometer at 77 K in a dewar vessel with 1 ms delay time after excitation using a microsecond ( $\mu$ s) flash lamp.

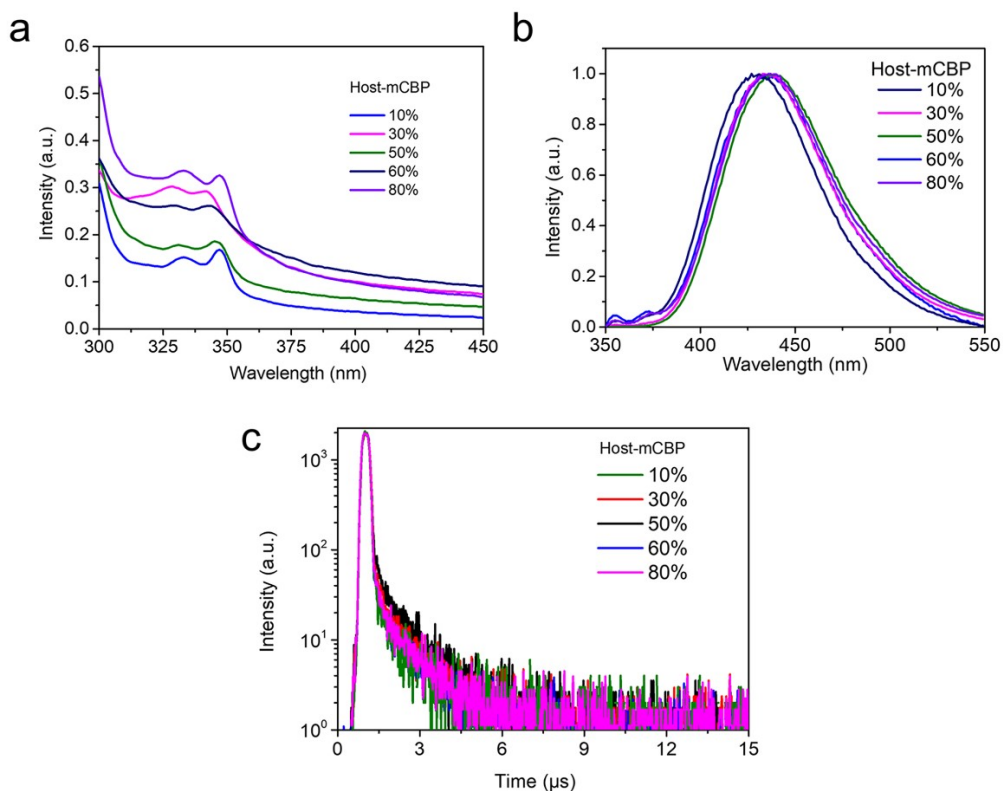

**Fig. S4** (a) UV-Vis absorption (b) fluorescence spectra and (c) PL transient decay spectra at room temperature for DNPbB-doped films of mCBP with different doped ratio.

**Table S3.** the data of DNPbB (X%) blend films doped with mCBP (1-X%).

| X<br>(%) | $\lambda_{\text{abs}}^a$<br>(nm) | $\lambda_{\text{PL}}^b$<br>(nm) | FHWH<br>(nm) | $\Phi_{\text{PL}}^c$<br>(%) | $\tau_d^d$<br>(μs) |
|----------|----------------------------------|---------------------------------|--------------|-----------------------------|--------------------|
| 10       | 331, 342                         | 420                             | 71           | 39                          | 0.95               |
| 30       | 331, 342                         | 433                             | 70           | 50.8                        | 0.98               |
| 50       | 331, 342                         | 444                             | 73           | 56.1                        | 1.01               |
| 60       | 331, 342                         | 437                             | 71           | 53.6                        | 0.96               |
| 80       | 331, 344                         | 435                             | 70           | 45.5                        | 0.96               |

<sup>a</sup> Absorption measured in 10<sup>-5</sup> mol L<sup>-1</sup> polystyrene solution; <sup>b</sup> Steady-state PL at room temperature measured in films. <sup>c</sup> PL quantum yield measured in films using an integral sphere. <sup>d</sup> Lifetime of fluorescence determined from the transient PL.

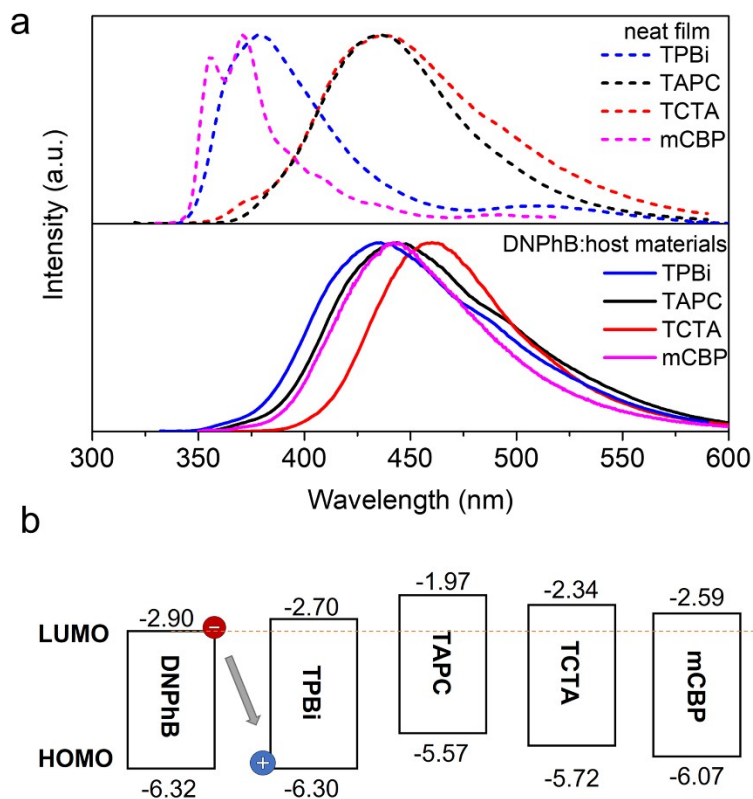

**Fig. S5** (a) PL spectra of TAPC, TCTA, TPBi and mCBP neat films and 50% doped with DNPhB respectively. (b) HOMO and LUMO of DNPhB and the host materials.

**Table S4.** Photophysical properties of 50% doped with DNPhB respectively.

| Host | $\lambda_{\text{PL}}^a$ (nm) | FHWH (nm) | $\Phi_{\text{PL}}^b$ (%) |
|------|------------------------------|-----------|--------------------------|
| TPBi | 432                          | 71        | 23.5                     |
| TAPC | 448                          | 70        | 10.5                     |
| TCTA | 462                          | 73        | 9.8                      |
| mCBP | 444                          | 71        | 53.6                     |

<sup>a</sup> Steady-state PL at room temperature measured in films. <sup>b</sup> PL quantum yield measured in films using an integral sphere.

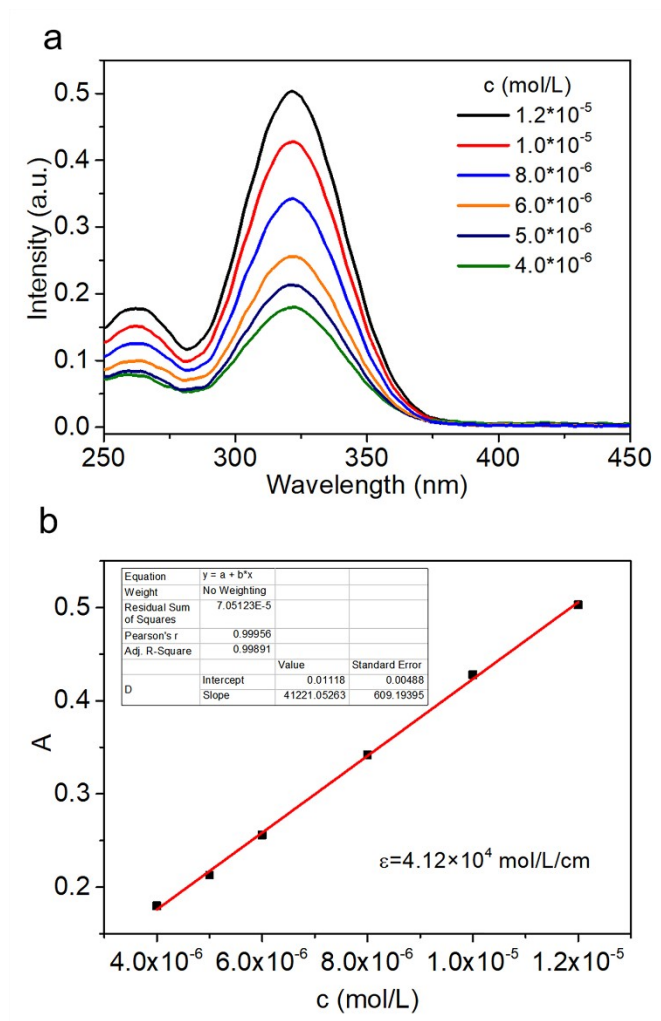

**Fig. S6** Concentration dependence of the absorbance of DNPhB in THF at 330 nm.

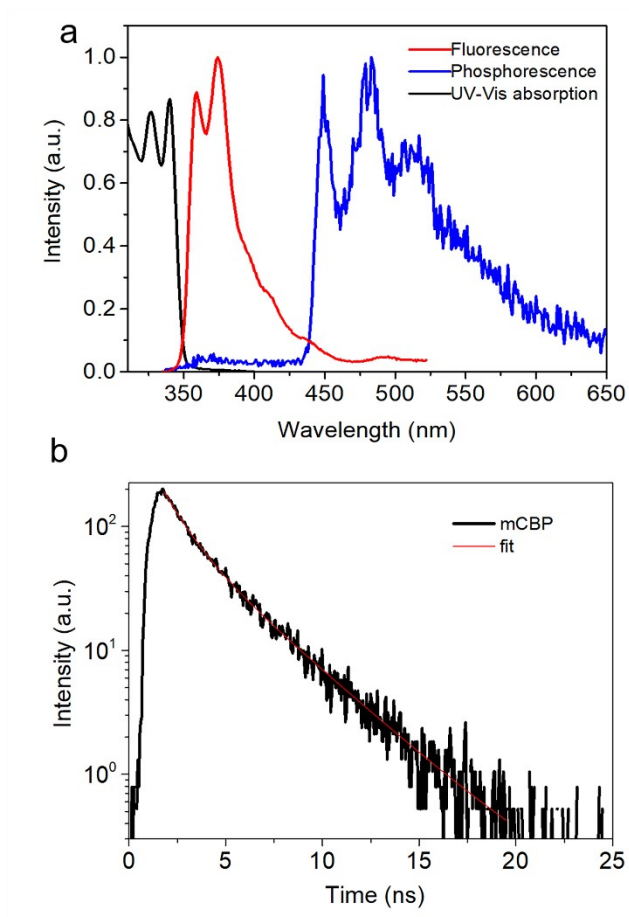

**Fig. S7** UV-Vis absorption and PL spectra in pure films. (a) UV-Vis absorption and fluorescence spectra at room temperature and phosphorescence spectra at 77 K for mCBP. (b) PL transient decay spectra for neat films of mCBP at rt.

**Table S5.** Photophysical properties of mCBP in neat films.

| Emitter | $\lambda_{\text{abs}}^a$<br>(nm) | $\lambda_{\text{PL}}^b$<br>(nm) | $\lambda_{\text{Phos.}}^c$<br>(nm) | $E_g^d$<br>(eV) | $S_1^d$<br>(eV) | $T_1^d$<br>(eV) | $\Delta E_{\text{ST}}^d$<br>(eV) | $\tau_p^e$<br>(ns) |
|---------|----------------------------------|---------------------------------|------------------------------------|-----------------|-----------------|-----------------|----------------------------------|--------------------|
| mCBP    | 347                              | 370                             | 455                                | 3.48            | 3.56            | 2.85            | 0.71                             | 0.64               |

<sup>a</sup> Absorption measured in 10<sup>-5</sup> mol L<sup>-1</sup> polystyrene solution; <sup>b</sup> Steady-state PL at room temperature measured in films; <sup>c</sup> Measured at 77 K with a delay; <sup>d</sup> Calculated from  $\lambda_{\text{onset}}$ ; <sup>e</sup> Lifetime of fluorescence determined from the transient PL.

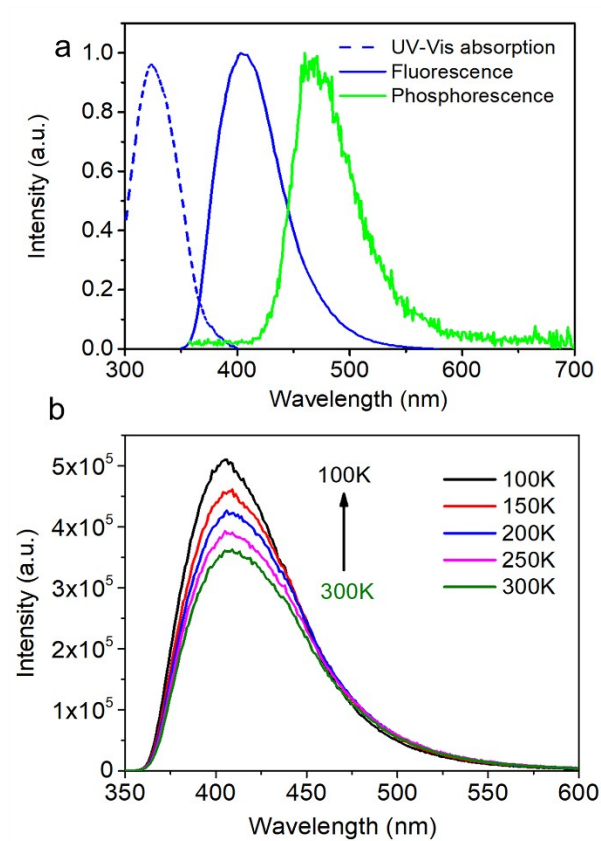

**Fig. S8** UV-Vis absorption and PL spectra for neat films. (a) UV-Vis absorption and fluorescence spectra at room temperature spectra at 77 K for DNPhB. (b) PL spectra for DNPhB in films from 100 K to 300 K.

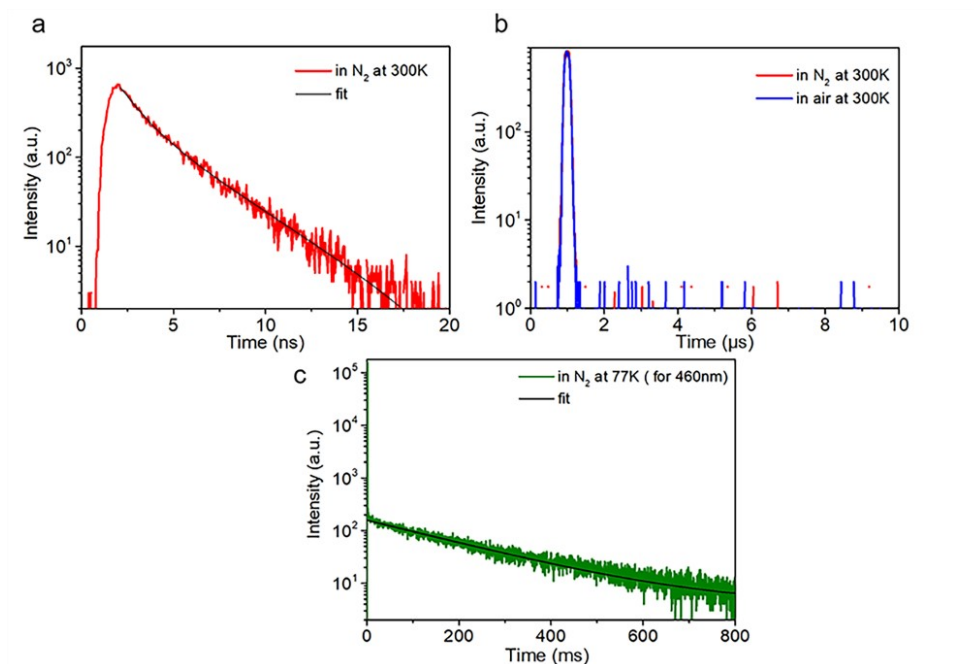

**Fig. S9** PL transient decay spectra for neat films of (a), (b) DNPhB at rt.

**Table S6.** Photophysical properties for neat film of DNPhB.

| Emitter | $\lambda_{\text{abs}}^a$<br>(nm) | $\lambda_{\text{PL}}^b$<br>(nm) | $\lambda_{\text{Phos}}^c$<br>(nm) | $E_g^d$<br>(eV) | $S_1^d$<br>(eV) | $T_1^d$<br>(eV) | $\Delta E_{\text{ST}}^d$<br>(eV) | $\tau_p^e$<br>(ns) |
|---------|----------------------------------|---------------------------------|-----------------------------------|-----------------|-----------------|-----------------|----------------------------------|--------------------|
| DNPhB   | 325                              | 405                             | 460                               | 3.32            | 3.42            | 2.95            | 0.47                             | 1.35               |

<sup>a</sup> Absorption measured in  $10^{-5}$  mol L<sup>-1</sup> Chlorobenzene solution. <sup>b</sup> Steady-state PL at room temperature measured in films. <sup>c</sup> Measured at 77 K with a delay. <sup>d</sup> Calculated from  $\lambda_{\text{onset}}$ . <sup>e</sup> Lifetime determined from the transient PL.

**Note S1.** Estimation of the Reverse intersystem crossing rate constant of the 50% MRs at 200K.

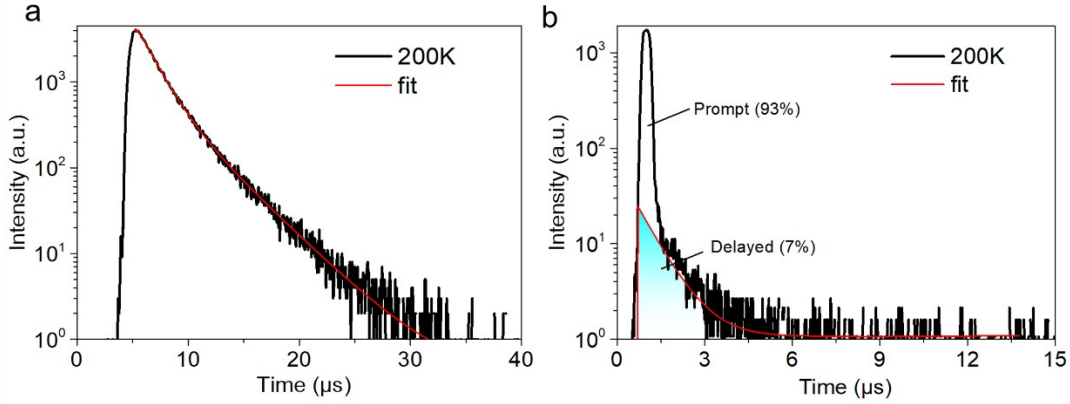

**Fig. S10** Transient decay spectra of 50% DNPhB/mCBP at 200 K.

The values are determined from PLQY and the lifetimes of the fluorescence and TADF components.  $\Phi_p$  and  $\Phi_d$  are calculated by their ratios of the integral areas in the time-resolved spectrum. Both the prompt and delayed components exhibit biexponential decays, these can be attribute to the coexist of the monomer and dimer in the doping MRs, so  $\tau_p$  and  $\tau_d$  are the average lifetime of the prompt and delayed components, they are calculated by  $\tau_{av} = \sum A_i \tau_i^2 / \sum A_i \tau_i$ , where  $A_i$  is the pre-exponential for lifetime  $\tau_i$  ( $A_i$  is the proportion of  $\tau_i$  here).<sup>1-3</sup>

$$\Phi=0.354$$

$$\Phi_p=0.326$$

$$\Phi_d=0.023$$

$$\tau_p=1.16 \text{ ns}$$

$$\tau_d=0.85 \text{ } \mu\text{s}$$

$$k_p=2.8 \times 10^8$$

$$k_{IC}=5.2 \times 10^8$$

$$k_{ISC}=5.8 \times 10^7$$

$$\Phi_{IC}=0.6$$

$$k_p = \Phi_p / \tau_p \quad (1)$$

$$\Phi = k_p / (k_p + k_{IC}) \quad (2)$$

$$\Phi_p = k_p / (k_p + k_{IC} + k_{ISC}) \quad (3)$$

$$\Phi_{IC} = k_{IC} / (k_p + k_{IC} + k_{ISC}) \quad (4)$$

$$\Phi_{ISC}=0.067$$

$$\Phi_{ISC} = k_{ISC}/(k_p + k_{IC} + k_{ISC})(5)$$

$$k_d=3.91*10^5$$

$$k_d = \Phi_d/(\Phi_{ISC} * \tau_d)(6)$$

$$k_{RISC}=4.72*10^5$$

$$k_{RISC} = (k_p * k_d)/(k_p - k_{ISC})(7)$$

Then,  $k_{RISC}$  can be estimated from the experimentally observable rate constants and the PL quantum yield of the prompt and delayed components. If the intersystem crossing (ISC) is independent of temperature because the ISC process is considered as an adiabatic process, the  $k_{ISC}$  values at higher temperatures are set equal to that at 200 K.

**Table S7.** PL characteristics of the exciplex formed between mCBP and DNPhB versus temperature

| T (K) | $\tau_p$ (ns) | $\tau_d$ ( $\mu$ s) | $\Phi_{\text{total}}$ | $\Phi_d$ | $\Phi_p$ |
|-------|---------------|---------------------|-----------------------|----------|----------|
| 300   | 1.75          | 1.02 (20.8%)        | 54.0%                 | 11%      | 43%      |
| 280   | 1.64          | 0.96 (17.8%)        | 50.0%                 | 8.9%     | 41.1%    |
| 260   | 1.55          | 0.94 (13.0%)        | 47.2%                 | 6.13%    | 41.1%    |
| 250   | 1.50          | 0.88 (11.0%)        | 45.0%                 | 4.95%    | 40.1%    |
| 240   | 1.40          | 0.87 (9.23%)        | 43.0%                 | 3.3%     | 39.7%    |
| 220   | 1.26          | 0.86 (8.51%)        | 38.7%                 | 3.3%     | 35.4%    |
| 200   | 1.16          | 0.85 (7.0%)         | 35.0%                 | 2.35%    | 32.6%    |

**Table S8.** Calculated rate constants of the exciplex emission from the mixed mCBP and DNPhB (molar ratio 1: 1) film.

| T (K) | $k_p$ ( $10^8\text{s}^{-1}$ ) | $k_d$ ( $10^5\text{s}^{-1}$ ) | $k_{\text{ISC}}$ ( $10^8\text{s}^{-1}$ ) | $k_{\text{RISC}}$ ( $10^5\text{s}^{-1}$ ) |
|-------|-------------------------------|-------------------------------|------------------------------------------|-------------------------------------------|
| 300   | 2.45                          | 5.44                          | 0.58                                     | 7.10                                      |
| 280   | 2.5                           | 5.2                           | 0.58                                     | 6.77                                      |
| 260   | 2.6                           | 4.9                           | 0.58                                     | 6.30                                      |
| 250   | 2.76                          | 4.75                          | 0.58                                     | 6.0                                       |
| 240   | 2.78                          | 4.68                          | 0.58                                     | 5.91                                      |
| 220   | 2.78                          | 4.26                          | 0.58                                     | 5.38                                      |
| 200   | 2.80                          | 3.91                          | 0.58                                     | 4.72                                      |

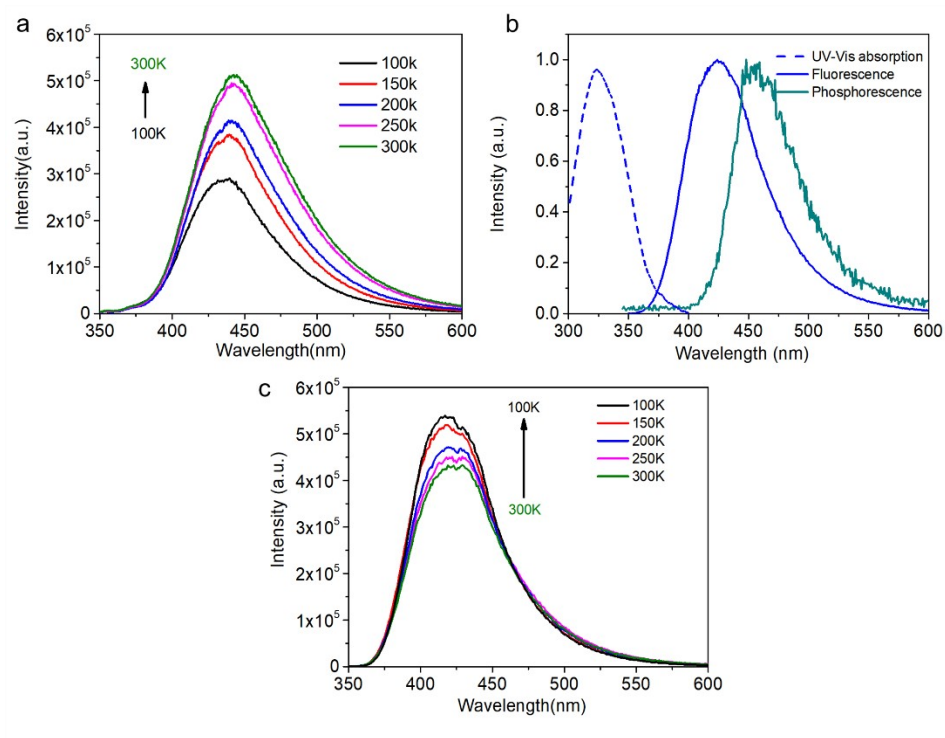

**Fig. S11** (a) PL spectra for DNPhB (50%) in polystyrene films from 100 K to 300 K. (b) UV-Vis absorption and fluorescence spectra at room temperature and phosphorescence spectra at 77 K for DNPhB (50%) in polystyrene films. (c) PL spectra for DNPhB (50%) in polystyrene films from 100 K to 300 K.

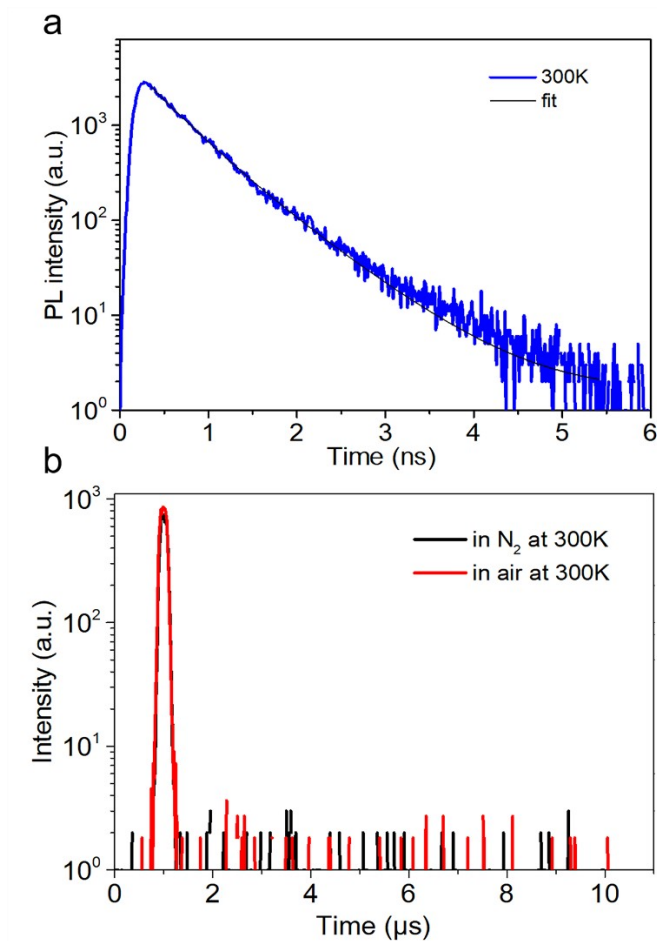

**Fig. S12** PL transient decay spectra of (a) and (b) DNPhB in polystyrene films.

**Table S9.** Photophysical properties for polystyrene film of DNPhB.

| Emitter | $\lambda_{\text{abs}}^a$<br>(nm) | $\lambda_{\text{PL}}^b$<br>(nm) | $\lambda_{\text{Phos.}}^c$<br>(nm) | $E_g^d$<br>(eV) | $S_1^d$<br>(eV) | $T_1^d$<br>(eV) | $\Delta E_{\text{ST}}^d$<br>(eV) | $\tau_p^e$<br>(ns) | $\tau_p^e$<br>( $\mu$ s) |
|---------|----------------------------------|---------------------------------|------------------------------------|-----------------|-----------------|-----------------|----------------------------------|--------------------|--------------------------|
| DNPhB   | 325                              | 423                             | 455                                | 3.32            | 3.42            | 3.01            | 0.41                             | 0.52               | ~                        |

<sup>a</sup> Absorption measured in  $10^{-5}$  mol L<sup>-1</sup> polystyrene solution; <sup>b</sup> Steady-state PL at room temperature measured in films; <sup>c</sup> Measured at 77 K with a delay; <sup>d</sup> Calculated from  $\lambda_{\text{onset}}$ ; <sup>e</sup> Lifetime of fluorescence determined from the transient PL.

### ***Thermal Property Measurements***

Thermogravimetric analysis (TGA) was conducted under a heating rate of 10°C/min and a nitrogen flow rate of 50 cm<sup>3</sup>/min from 25°C to 500°C with a TG 209F3 Tarsus instrument. TGA reveals that DNPhB has a good thermal stability with a high decomposition temperature ( $T_d = 296^\circ\text{C}$ ). Differential Scanning Calorimeter was conducted under a heating rate of 10°C/min and a nitrogen flow rate of 50 cm<sup>3</sup>/min from 25°C to 300°C. Its glass transition temperature ( $T_g$ ) is 353°C, which is high  $T_g$  to ensure excellent film forming property after annealing.

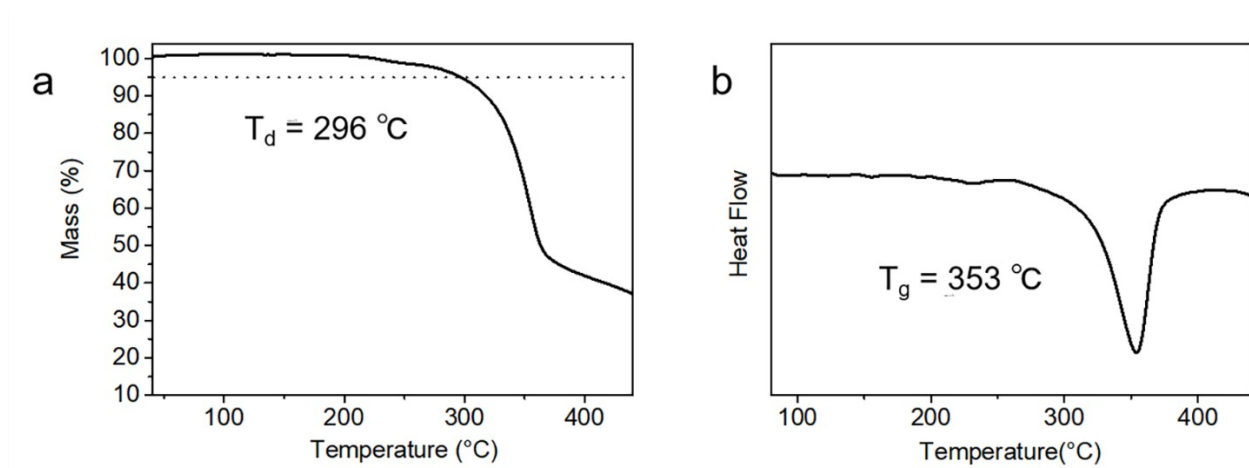

***Fig. S13*** Thermal gravimetric analysis (a) and differential scanning calorimetry analysis, (b) of DNPhB.

### *X-ray diffraction (XRD) Measurements*

The X-ray diffraction (XRD) patterns were measured by a Smartlab 9KW X-ray diffractometer with Cu K $\alpha$  radiation ( $\lambda = 1.54050 \text{ \AA}$ ) operated in the  $2\theta$  range from  $5^\circ$  to  $30^\circ$ .

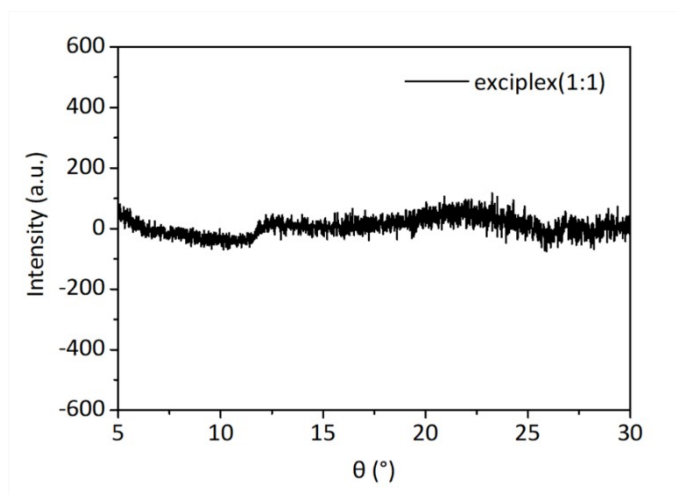

**Fig. S14** XRD pattern of 1:1 vapor-deposited light-emitting layer with a thickness of 25 nm on ITO.

### ***Atomic Force Microscopy (AFM) height images***

The doping film morphology of mCBP:DNPhB was investigated by AFM measurements, which were carried out room temperature using a Bruker Dimension Icon AFM

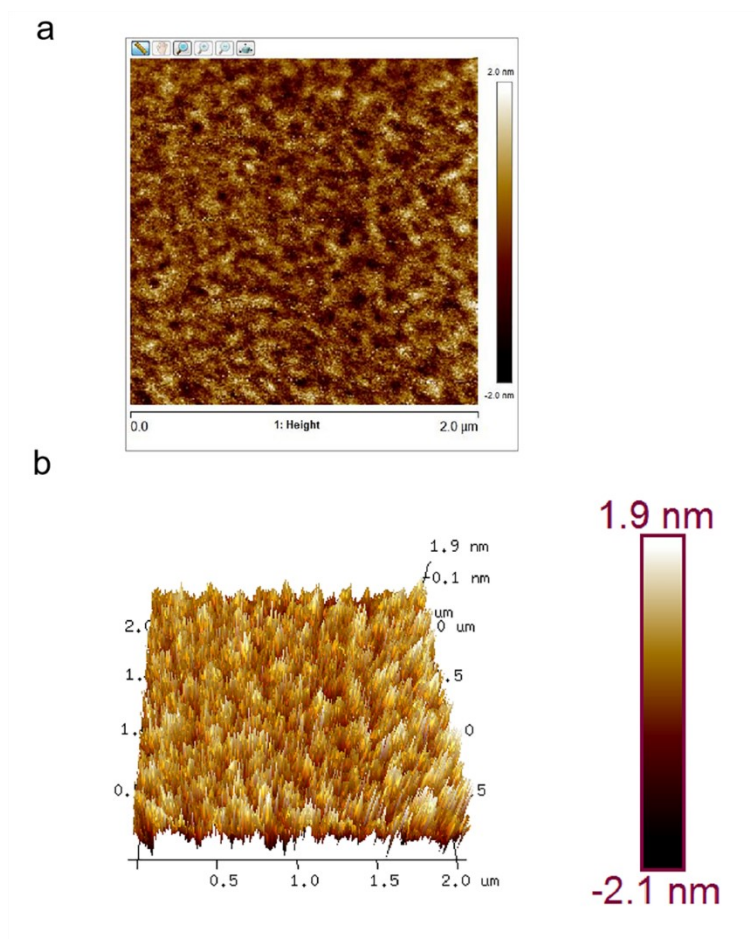

**Fig. S15** AFM images ( $2\ \mu\text{m} \times 2\ \mu\text{m}$ ) of the surface morphology of the vacuum evaporated film (RMS = 0.65 nm) overlaid onto surface.

### ***OLED Device Fabrication and Measurements***

All the organic materials used directly in this OLED experiments (except for the DNPhB) were purchased from Xi'an Polymer Light Technology Corp. The ITO substrates were firstly cleaned with isopropyl alcohol and deionized water, then dried in an oven at 110 °C, treated with O<sub>3</sub> plasma. After that, the samples were transferred to a thermal evaporator chamber. Organic materials, LiF, and Al were deposited by thermal evaporation under a pressure of  $2 \times 10^{-4}$  Pa. The electroluminescence characters were measured with a Photoresearch SpectraScan PR735 spectrometer and the current-voltage characteristics were measured using Keithley 2400 source meter under the encapsulation conditions.

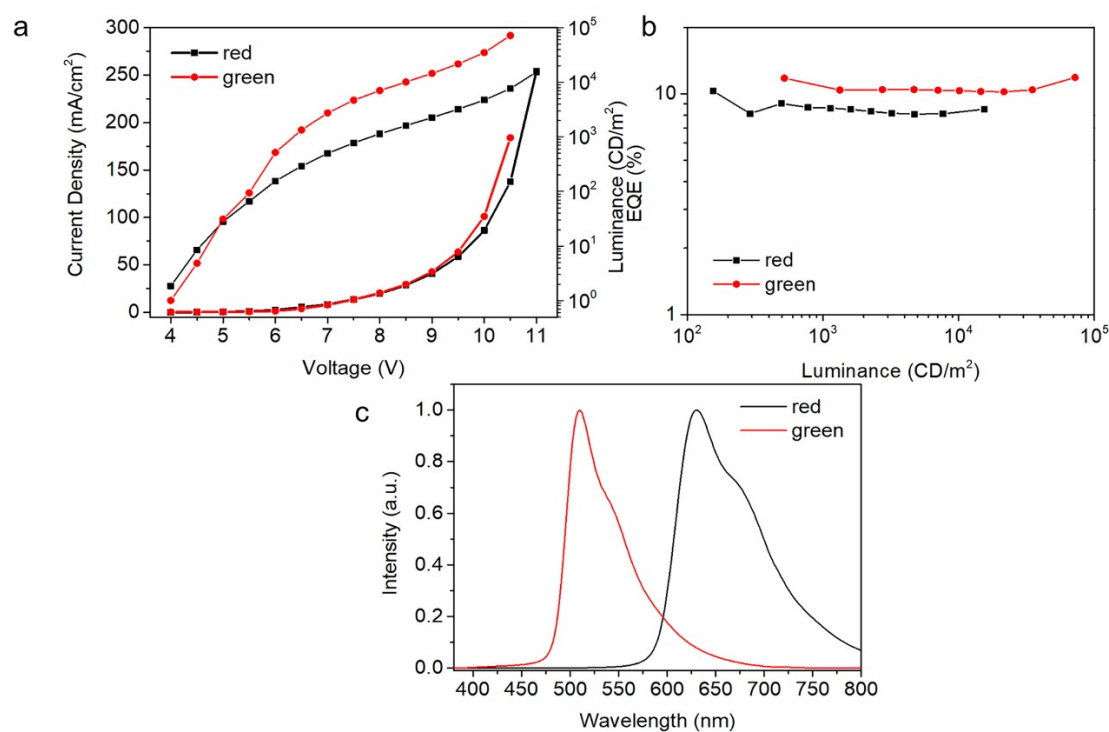

**Fig. S16** OLED properties of the different doped in traditional host materials (mCBP). (a) The current density-voltage-luminance curves of the devices. (b) External quantum efficiency versus luminance. (c) Electroluminescent (EL) spectra in 1000 cd m<sup>-2</sup>.

**Table S10.** The summary of the deep-blue devices performances.

| Device | V <sub>on</sub> <sup>a</sup><br>(V) | L <sub>max</sub><br>(cd m <sup>-2</sup> ) | CE/PE/EQE <sup>b</sup> (cd A <sup>-1</sup> /lm W <sup>-1</sup> /%) |                            | Peak <sub>max</sub> <sup>c</sup><br>(nm) | CIE <sup>c</sup><br>(x, y) |
|--------|-------------------------------------|-------------------------------------------|--------------------------------------------------------------------|----------------------------|------------------------------------------|----------------------------|
|        |                                     |                                           | Maximum                                                            | At 1000 cd m <sup>-2</sup> |                                          |                            |
| 40%    | 3.7                                 | 4098                                      | 2.63/2.07/4.26                                                     | 2.26/1.02/3.46             | 444                                      | (0.152, 0.079)             |
| 50%    | 3.7                                 | 5486                                      | 3.04/2.20/4.83                                                     | 2.65/1.28/4.24             | 444                                      | (0.152, 0.075)             |
| 60%    | 4.0                                 | 5001                                      | 3.07/2.11/4.06                                                     | 2.64/1.10/3.54             | 450                                      | (0.152, 0.090)             |

<sup>a</sup> The voltage at the luminance of 1 cd m<sup>-2</sup>; <sup>b</sup> CE: current efficiency; PE: power efficiency; EQE: external quantum efficiency; <sup>c</sup> CIE coordinates measured at 1000 cd m<sup>-2</sup>.

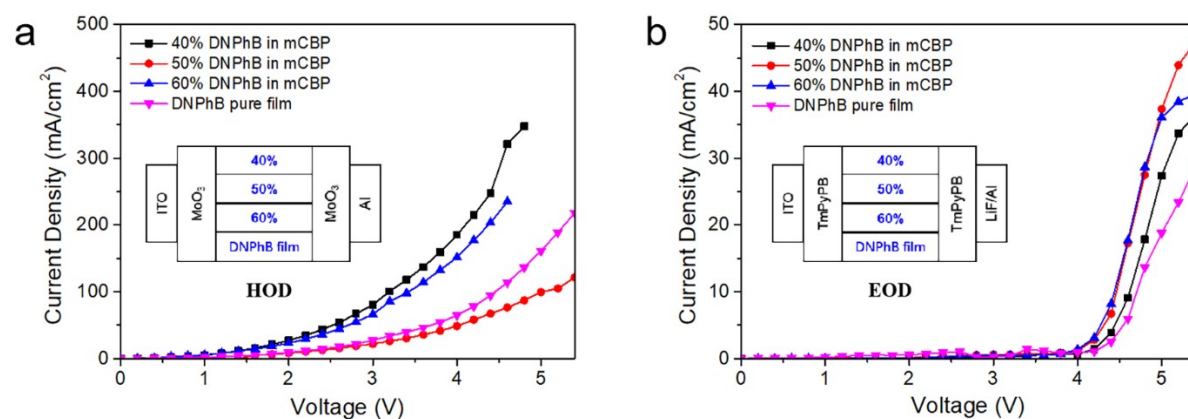

**Fig. S17** The J-V curves for both hole-only device (HOD) and electron-only device (EOD). The HOD structure consists of ITO/MoO<sub>3</sub>(10nm)/EML(50nm)/MoO<sub>3</sub>(10nm)/Al(100nm), while the EOD structure comprises ITO/TmPyPB(10nm)/EML(50nm)/TmPyPB(10nm)/ LiF(1nm)/ Al(100nm). The inset in (a) and (b) respectively shows the device structures for HOD and EOD.

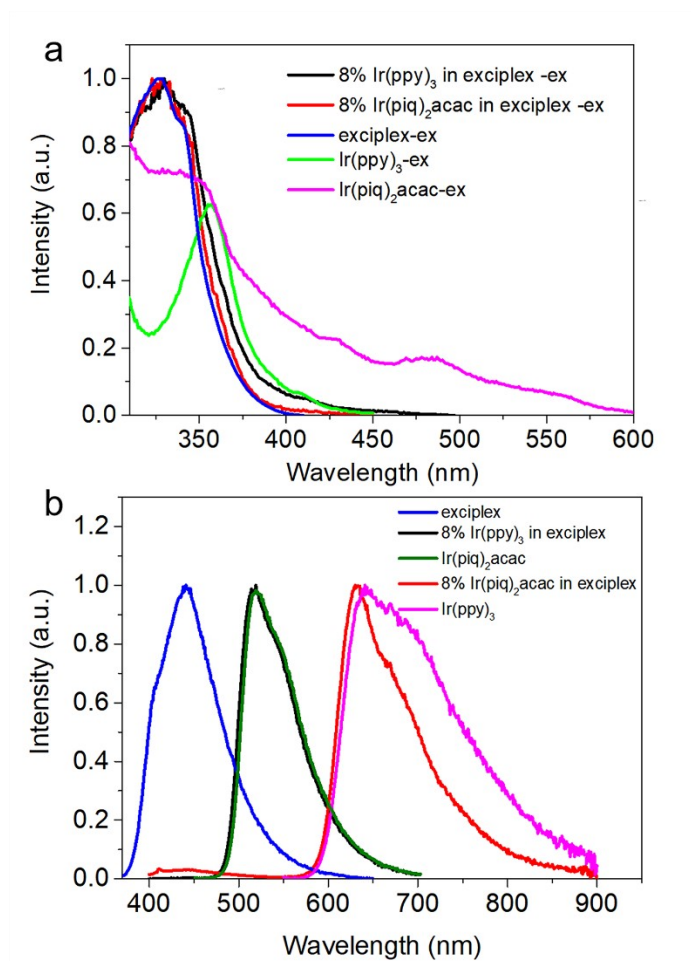

**Fig. S18** (a) Excitation spectra and (b) PL spectra for 8% Ir(ppy)<sub>3</sub>/8% Ir(piq)<sub>2</sub>acac in exciplex, exciplex, Ir(ppy)<sub>3</sub>, Ir(piq)<sub>2</sub>acac films at 300 K.

## References

1. Q. S. Zhang, H. Kuwabara, W. J. Potscavage, S. P. Huang, Y. Hatae, T. Shibata and C. Adachi, *Journal of the American Chemical Society* 2014, **136**, 18070.
2. X. Y. Cai, W. D. Qiu, M. K. Li, B. B. Li, Z. H. Wang, X. Wu, D. C. Chen, X. F. Iang, Y. Cao and S. J. Su, *Advanced Optical Materials* 2019, **7**, 1801554
3. R. B. Bai, X. W. Meng, X. X. Wang and L. He, *Advanced Functional Materials* 2021, **31**, 2007167
